# Supplementary material for: Analyzing the symmetrical arrangement of structural repeats in proteins with CE-Symm
Source: PubMed Central journal article supplement (PMC6504099; doi:10.1371/journal.pcbi.1006842), 2019-04-22
Supplement: pcbi.1006842.s006.pdf [file pcbi.1006842.s006.pdf]

## Analyzing the symmetrical arrangement of structural repeats in proteins with CE-Symm [S1 Tab]

Spencer E Bliven, Aleix Lafita, Peter W Rose, Guido Capitani, Andreas Prlić, Philip E Bourne

| Type                | Count      | Percentage   |
|---------------------|------------|--------------|
| <b>Asymmetric</b>   | <b>747</b> | <b>74.2%</b> |
| <b>Rotational</b>   | <b>214</b> | <b>21.2%</b> |
| C2                  | 160        | 74.8%        |
| C3                  | 10         | 4.7%         |
| C4                  | 2          | 0.9%         |
| C5                  | 3          | 1.4%         |
| C6                  | 9          | 4.2%         |
| C7                  | 10         | 4.7%         |
| C8                  | 20         | 9.3%         |
| <b>Dihedral</b>     | <b>18</b>  | <b>1.8%</b>  |
| D2                  | 14         | 77.8%        |
| D3                  | 1          | 5.6%         |
| D4                  | 2          | 11.1%        |
| D5                  | 1          | 5.6%         |
| <b>Helical</b>      | <b>11</b>  | <b>1.1%</b>  |
| H2                  | 9          | 81.8%        |
| H3                  | 2          | 18.2%        |
| H10                 | 1          | 9.1%         |
| <b>Superhelical</b> | <b>2</b>   | <b>0.2%</b>  |
| <b>Repeats</b>      | <b>15</b>  | <b>1.5%</b>  |

S1 Tab. Summary of the updated annotations in the internal symmetry benchmarking dataset.
