# Supplementary material for: Analyzing the symmetrical arrangement of structural repeats in proteins with CE-Symm
Source: PubMed Central journal article supplement (PMC6504099; doi:10.1371/journal.pcbi.1006842), 2019-04-22
Supplement: pcbi.1006842.s009.pdf [file pcbi.1006842.s009.pdf]

# Analyzing the symmetrical arrangement of structural repeats in proteins with CE-Symm [S4 Tab]

Spencer E Bliven, Aleix Lafita, Peter W Rose, Guido Capitani, Andreas Prlić, Philip E Bourne

| Method         | Precision | Cramer V |
|----------------|-----------|----------|
| GRAPHCOMPONENT | 0.598     | 0.652    |
| DELTAPOSITION  | 0.783     | 0.728    |
| ROTATIONANGLE  | 0.754     | 0.642    |

**S4 Tab. Performance measures of the symmetry order detection methods for domains in the benchmark dataset with closed symmetry.** Precision measures the total fraction of correct predictions and Cramer V measures the correlation between actual and predicted classes. Both measures have values in the [0,1] interval, where 1 means perfect precision and correlation.
